# Supplementary material
Source: Frontiers journal article supplement (https://www.frontiersin.org/articles/548235)
Supplement: Data_Sheet_1.zip [file Data_Sheet_1.zip]

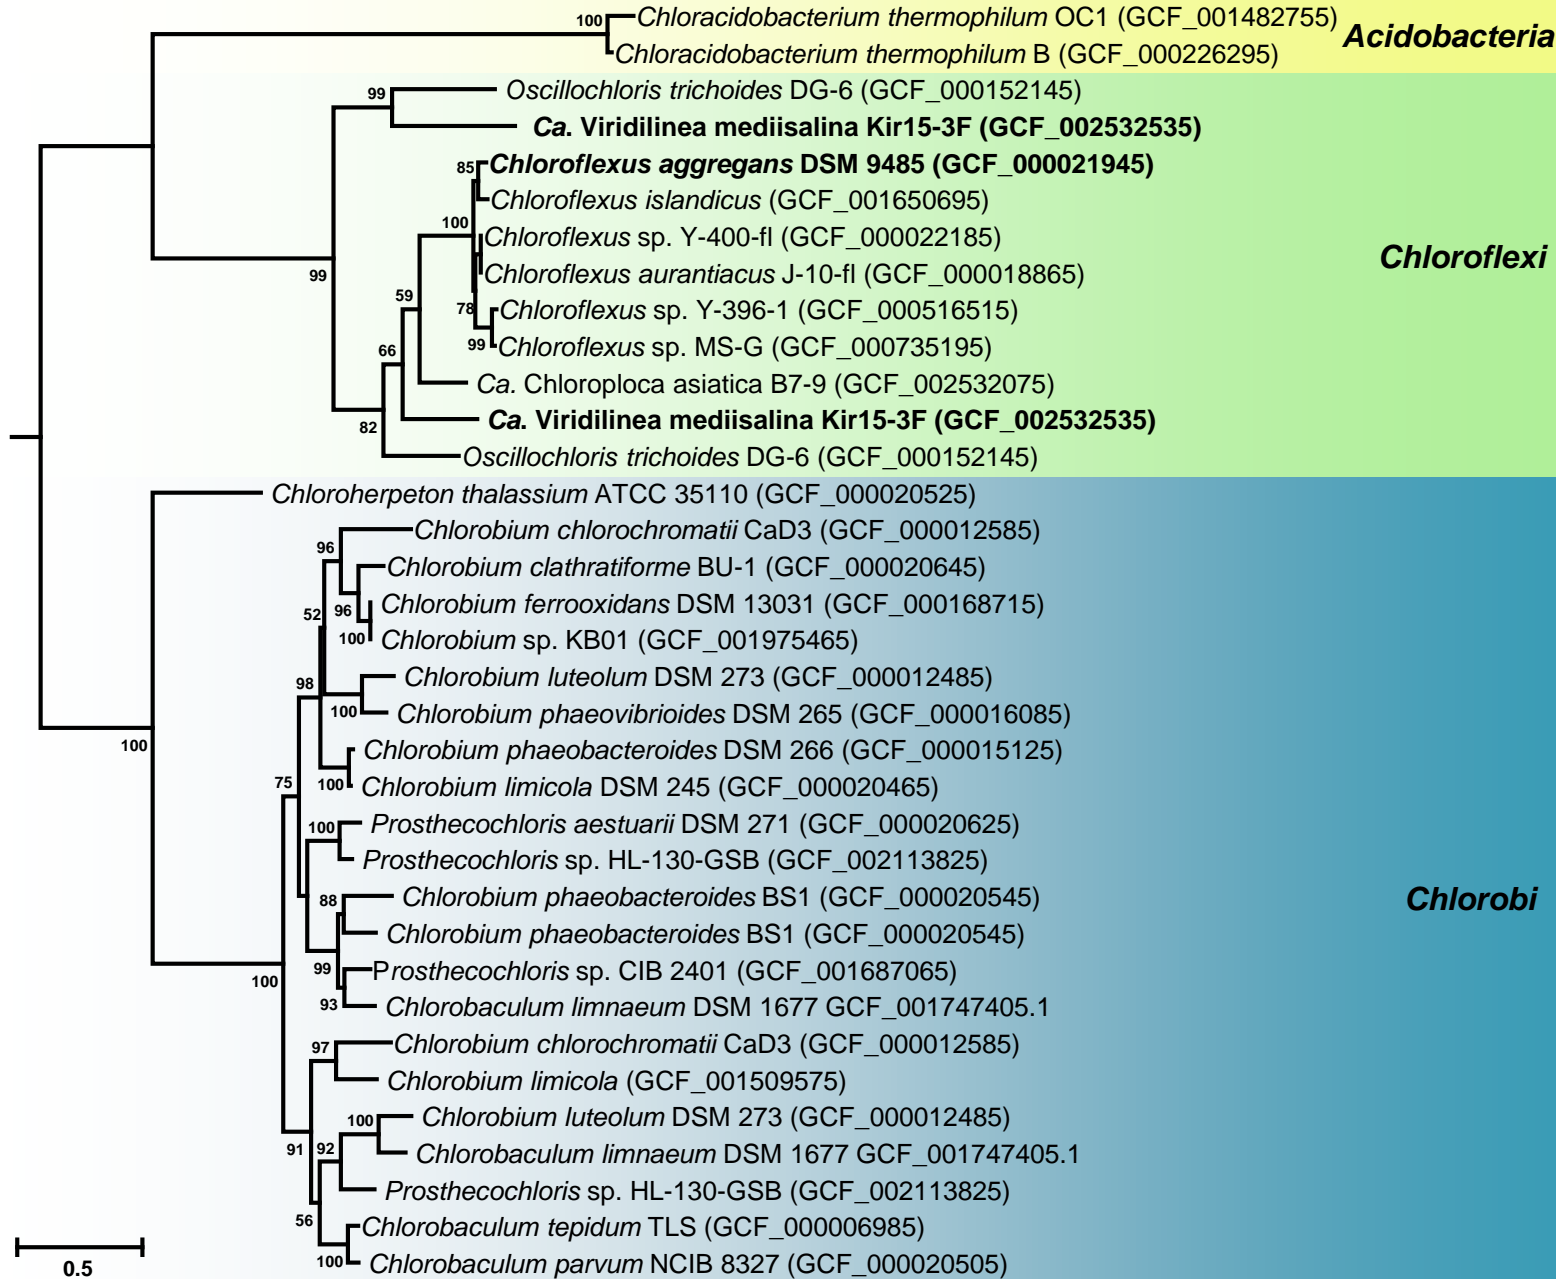

Supplementary Figure S7. Maximum likelihood phylogenetic tree of bacteriochlorophyll *c* synthase (BchK) amino acid sequences, based on a LG+F+I+G4 protein substitution model. Black numbers represent ultrafast bootstrap values (>50%) expressed in percent. The scale bar represents amino acid substitutions per site.
