# Supplementary material
Source: Frontiers journal article supplement (https://www.frontiersin.org/articles/548235)

# Supplementary Figure S2

A *R. castenholzii*

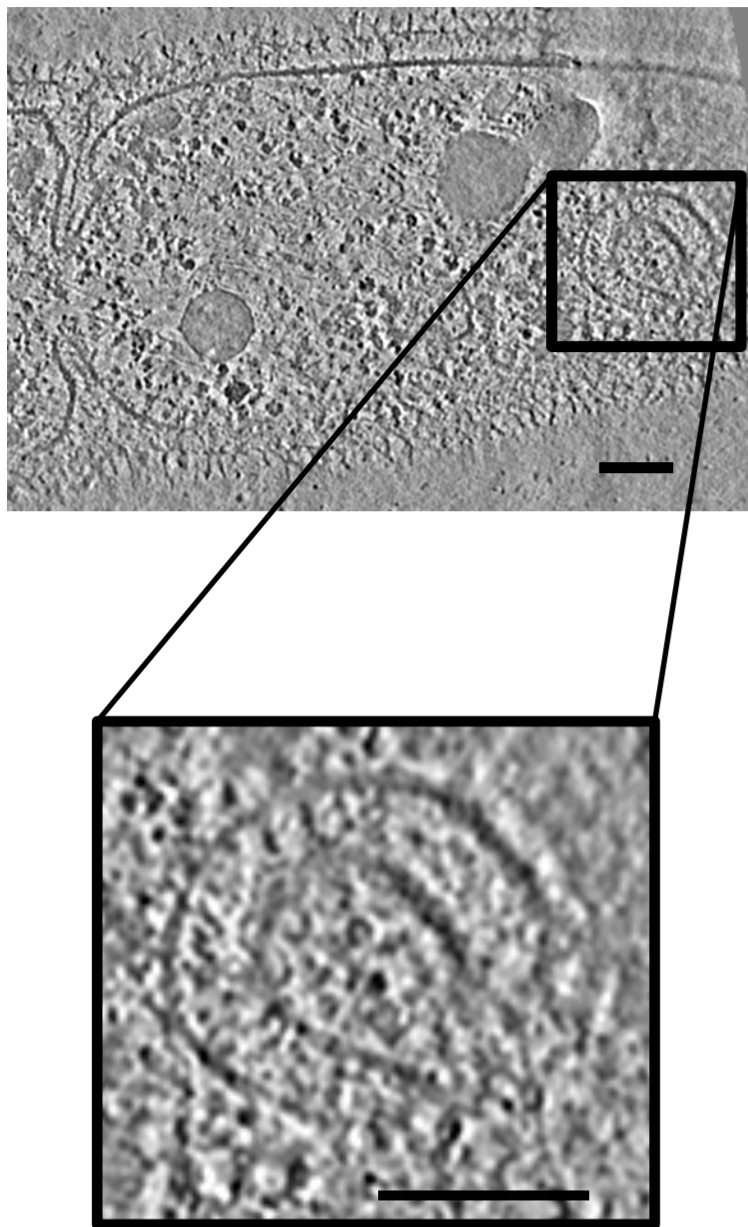

*C. aggregans*

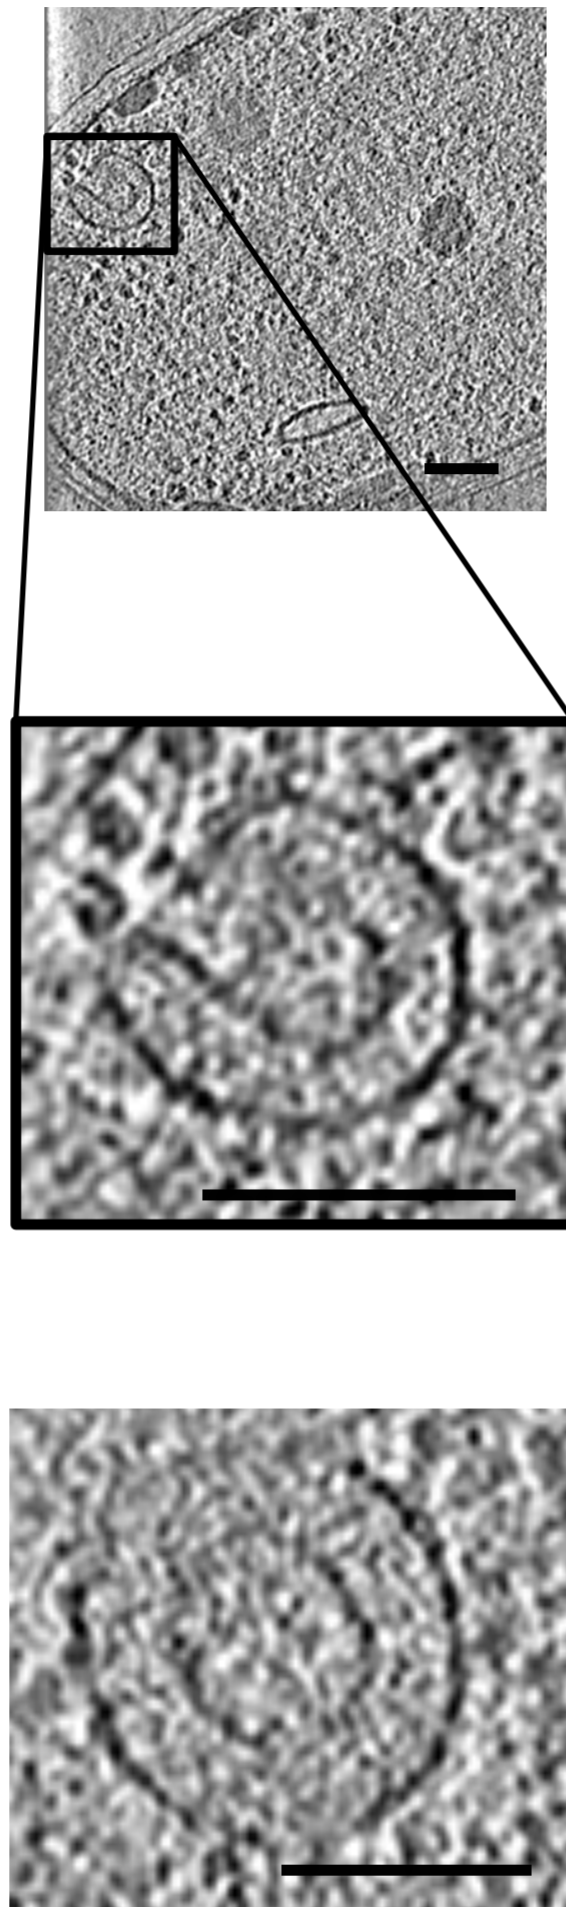

'*Ca. Viridilinea mediisalina*'

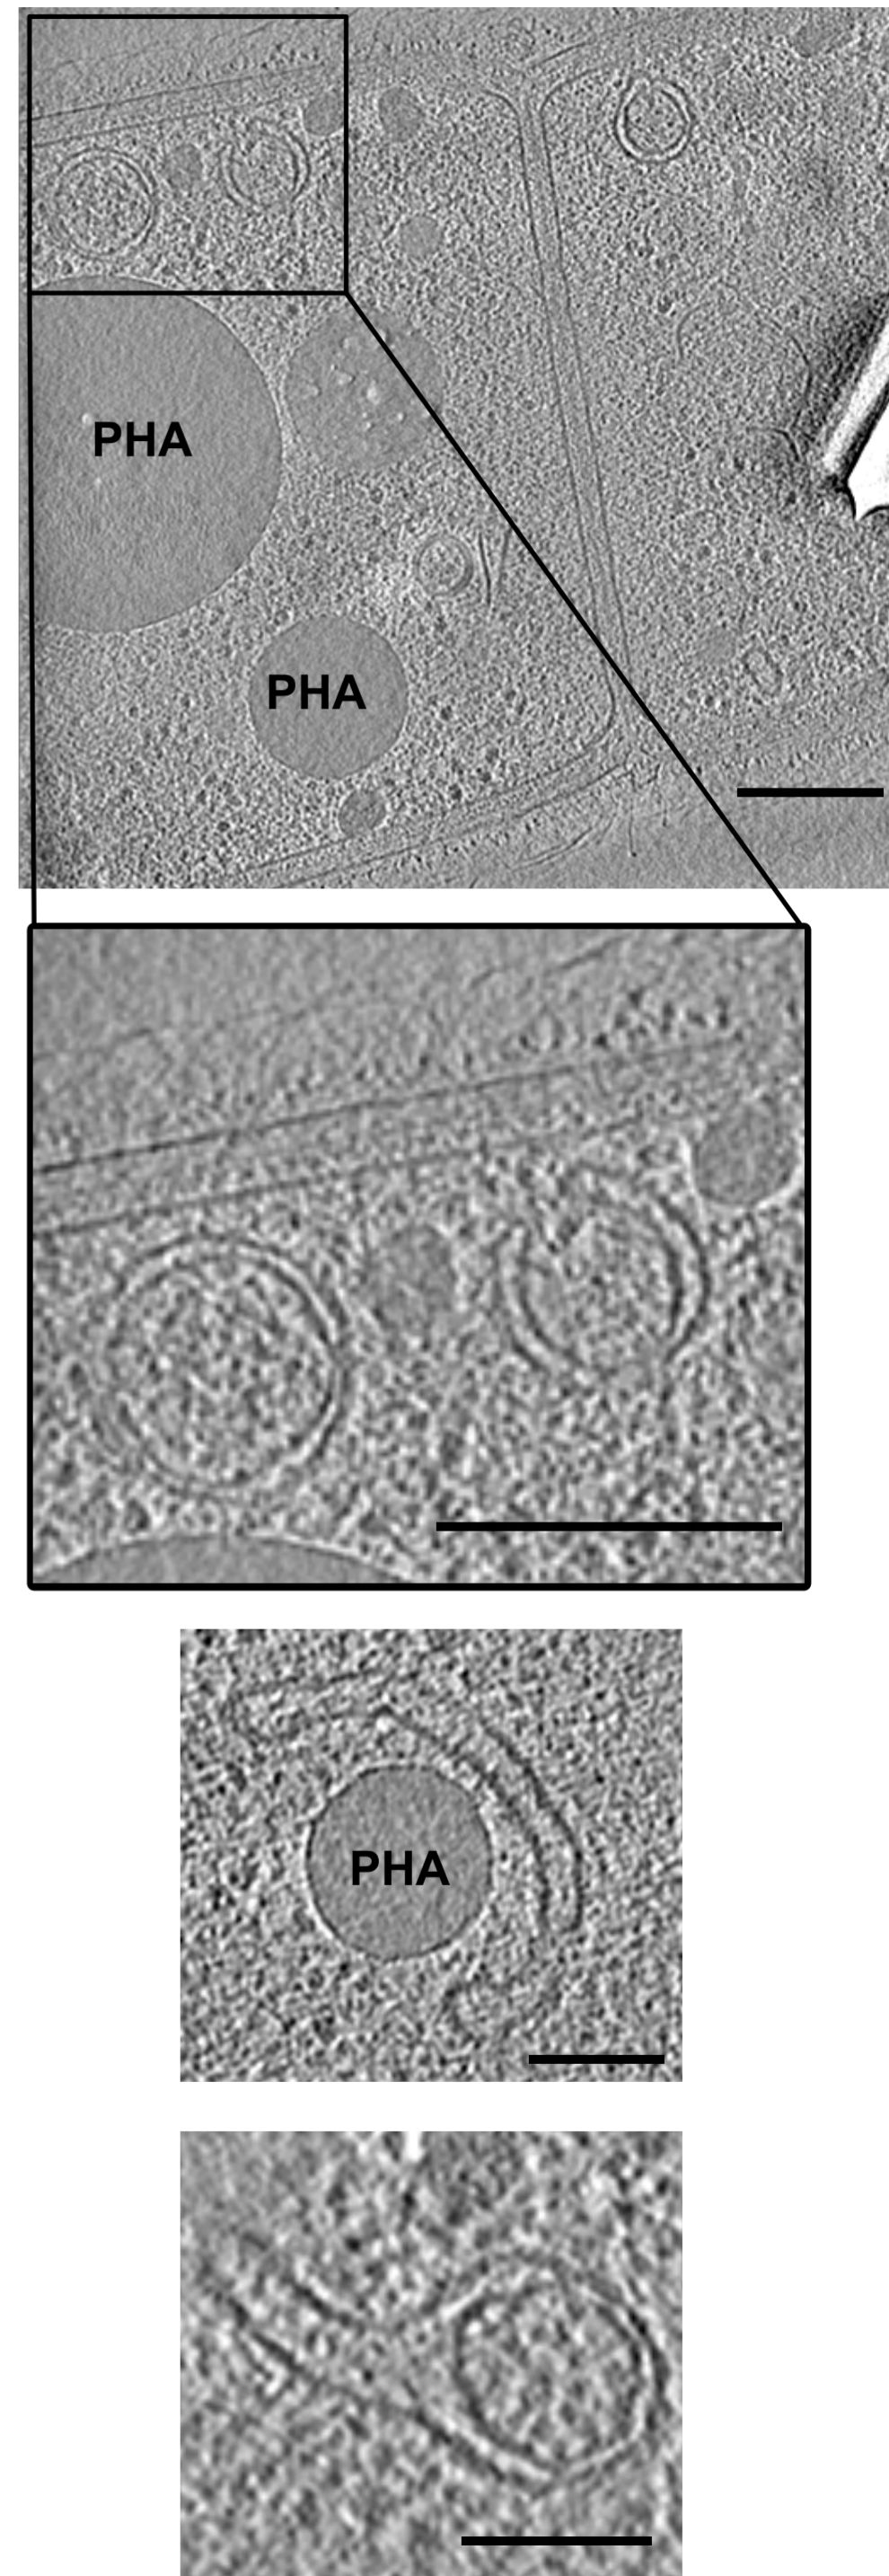

B

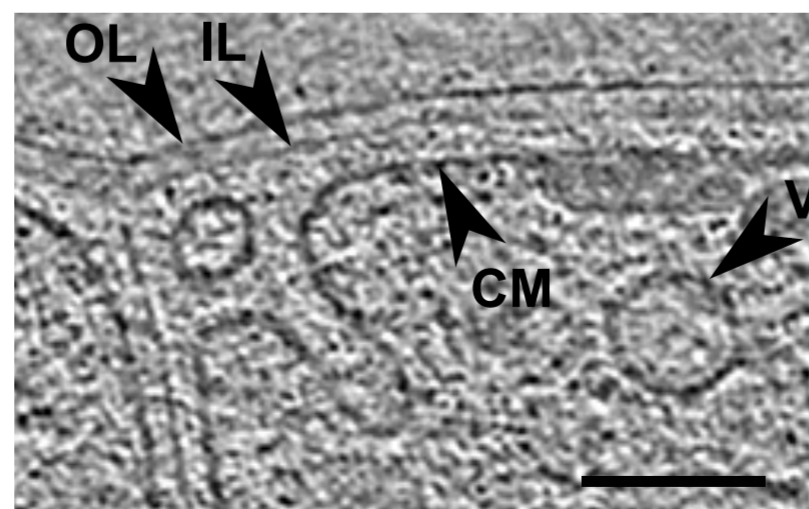

Supplement: Data_Sheet_1.zip [file Data_Sheet_1.zip]

# Supplementary Figure S1

## A '*Ca. Viridilinea mediisalina*'

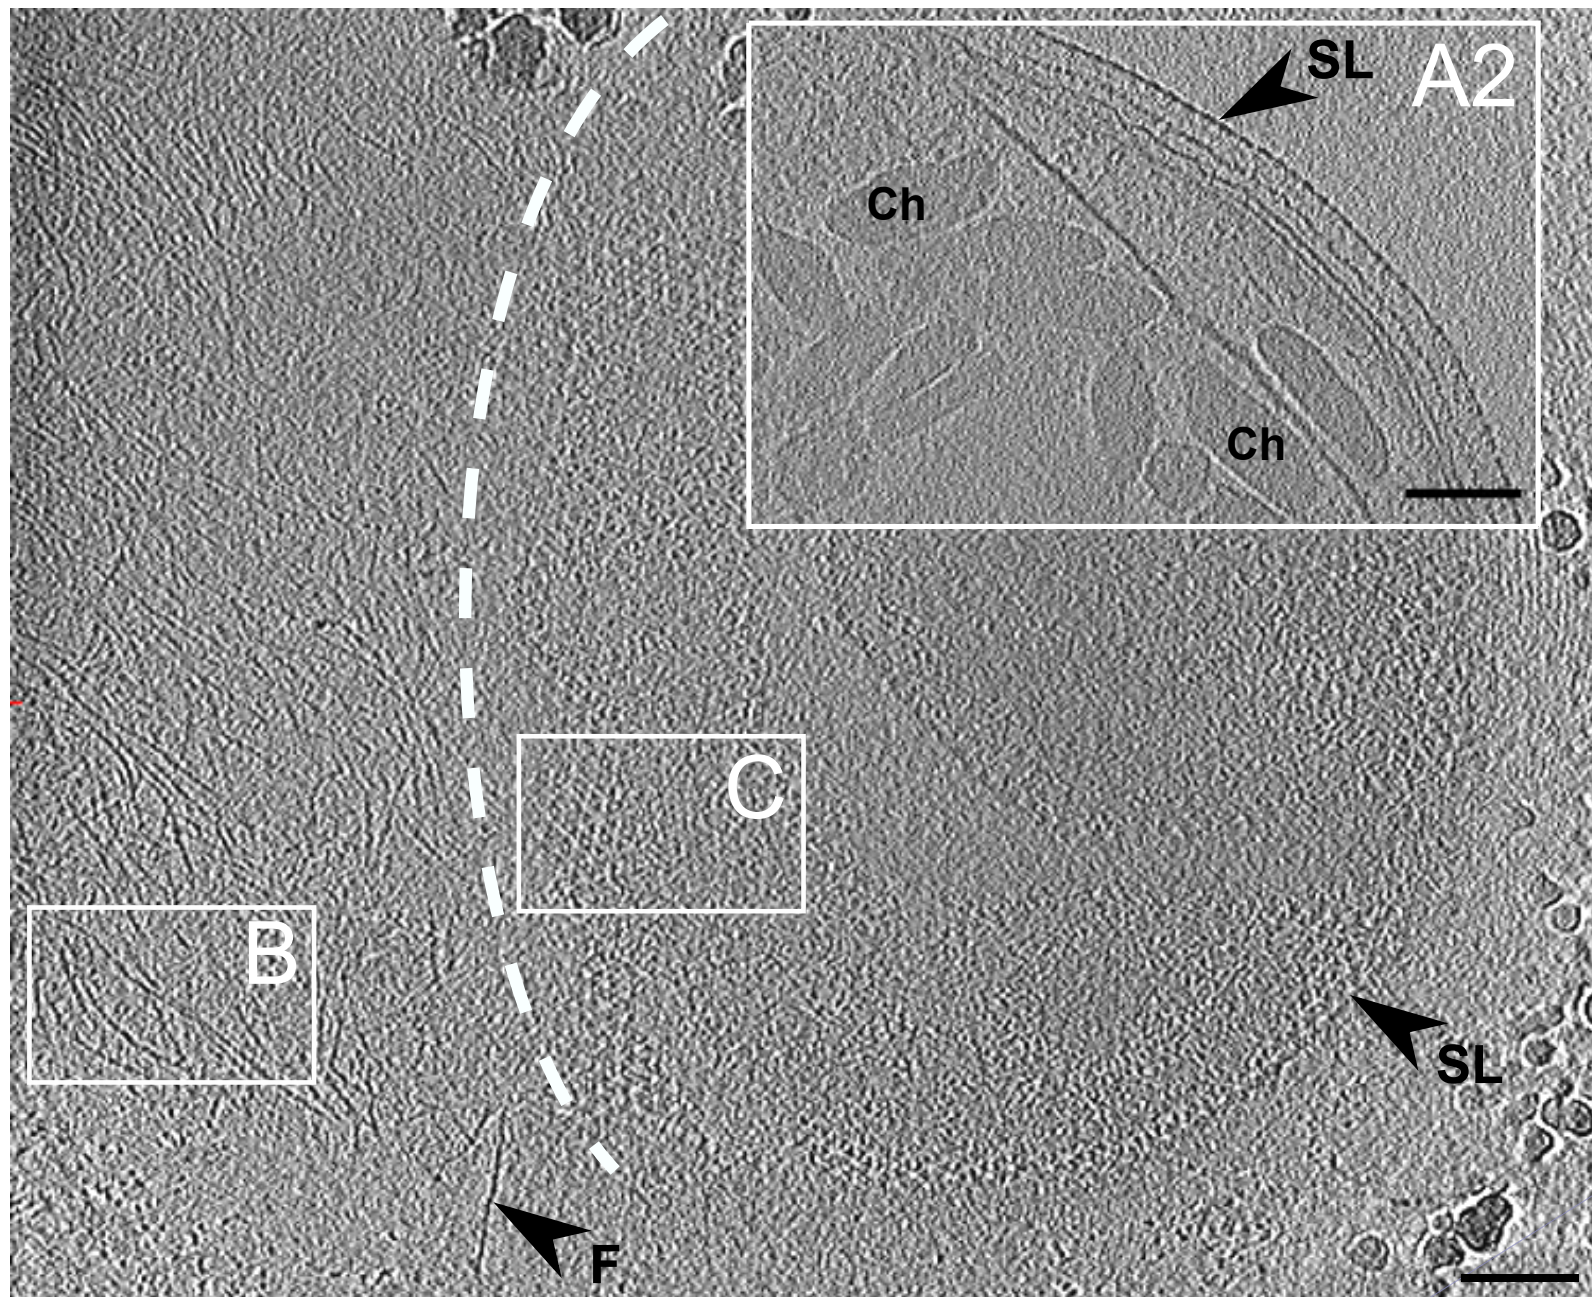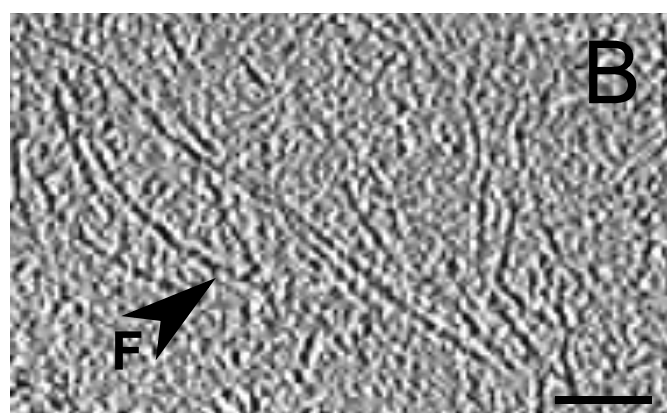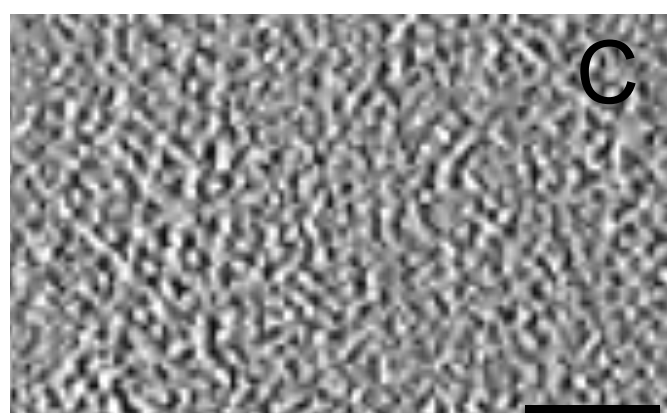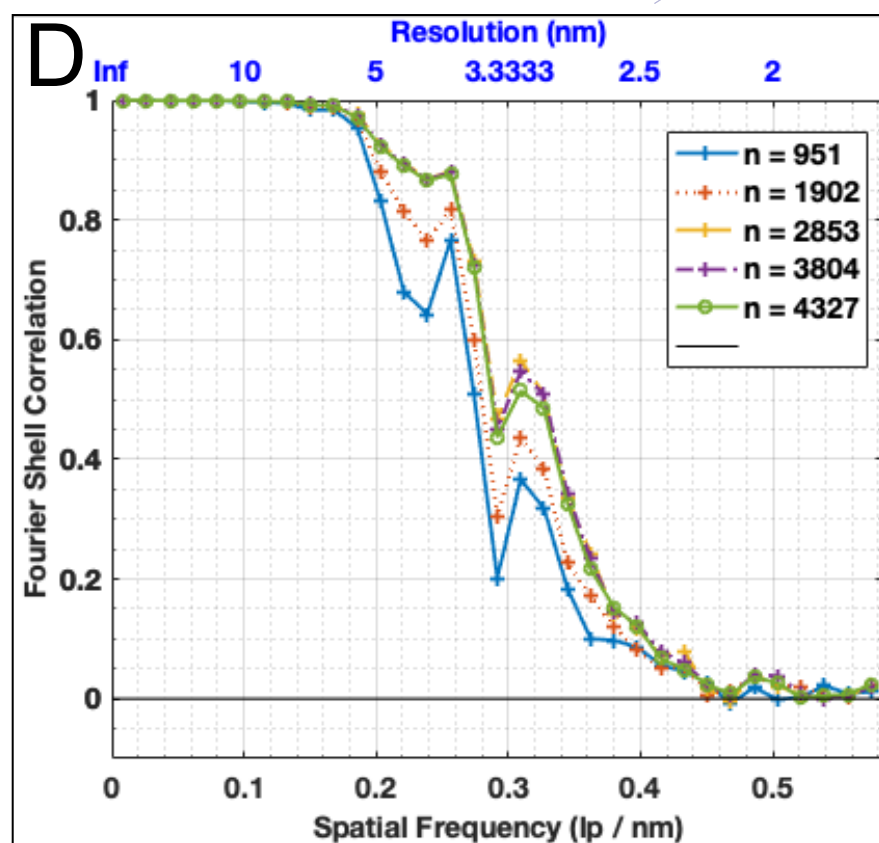

Supplement: Data_Sheet_1.zip [file Data_Sheet_1.zip]
